1 **Exploring the lower thermal limits for transmission of human malaria, *Plasmodium***  
2 ***falciparum***

3

4

5 Jessica L. Waite<sup>1,\*§</sup>, Eunho Suh<sup>1,§</sup>, Penelope A. Lynch<sup>2</sup>, and Matthew B. Thomas<sup>1</sup>

6

7 <sup>1</sup> Center for Infectious Disease Dynamics and Department of Entomology, The

8 Pennsylvania State University, University Park, PA 16802 USA

9 <sup>2</sup> University of Exeter, College of Life & Environmental Sciences, Penryn Campus,

10 Cornwall, TR10 9FE, UK

11 \*Author for correspondence, [jessi.waite@gmail.com](mailto:jessi.waite@gmail.com)

12 §These authors contributed equally.

13

14

15

16

17 **Keywords:** pathogen, extrinsic incubation period, climate change, parasite infection,

18 highlands, malaria risk

19

20

21

22

23

24 **Abstract**

25 The rate of malaria transmission is strongly determined by parasite development time in  
26 the mosquito, known as the extrinsic incubation period (EIP), since the quicker parasites  
27 develop, the greater the chance that the vector will survive long enough for the parasite to  
28 complete development and be transmitted. EIP is known to be temperature dependent but  
29 this relationship is surprisingly poorly characterized. There is a single degree-day model  
30 for EIP of *Plasmodium falciparum* that derives from a limited number of poorly  
31 controlled studies conducted almost a century ago. Here, we show that the established  
32 degree-day model greatly underestimates the rate of development of *P. falciparum* in  
33 both *Anopheles stephensi* and *An. gambiae* mosquitoes at temperatures in the range of 17-  
34 20°C. We also show that realistic daily temperature fluctuation further speeds parasite  
35 development. These novel results challenge one of the longest standing models in malaria  
36 biology and have potentially important implications for understanding the impacts of  
37 climate change.

38

39

40 **1. Introduction**

41 The transmission of vector-borne diseases is strongly influenced by environmental  
42 temperature [1,2]. For this reason, there is considerable interest in the possible effects of  
43 climate change on the dynamics and distribution of diseases such as malaria (e.g. [3-6]).  
44 One of the key temperature dependencies in malaria transmission is the Extrinsic  
45 Incubation Period (EIP; also defined as the duration of sporogony), which describes the  
46 time it takes following an infectious blood meal for parasites to develop within a

47 mosquito and become transmissible [7].

48

49 Most mechanistic models of *Plasmodium falciparum* transmission base estimates of EIP

50 on the degree-day model of Detinova [8]:

51

$$52 \quad \text{EIP (in days)} = 111 / (T^{\circ}\text{C} - 16^{\circ}\text{C}) \quad [\text{Eq 1}].$$

53

54 In this model, 111 is the cumulative number of degree-days required for the parasite to

55 complete development once temperature exceeds a lower developmental threshold, T is

56 the average ambient environmental temperature, and 16°C is the lower temperature

57 threshold. However, in spite of widespread use for over 50 years, the Detinova degree-

58 day model is poorly validated (reviewed in [7]). For example, the model was

59 parameterized with limited data from a single study conducted in the 1930's using the

60 Eurasian vector, *Anopheles maculipennis* [9]. This work provided no empirical

61 measurements of EIP below 20-21°C. Similar historic studies either lacked temperature

62 control, adequate sampling, or did not use *P. falciparum* parasites (e.g. [10-13]). To date,

63 virtually no published studies have measured EIP at cooler temperatures, or confirmed

64 the lower developmental threshold. Further, the model is based on constant temperatures,

65 yet temperatures in the field exhibit diurnal fluctuation, which could affect parasite

66 development [14].

67

68 Here we use *An. stephensi* and *An. gambiae* mosquitoes to determine the lower

69 temperature threshold of *P. falciparum*, evaluate EIP at temperatures below 20°C, and

70 examine whether the degree-day model is robust to daily temperature variation.

71

72

## 73 **2. Material and methods**

74 (a) Experimental treatments

75 Mosquitoes were reared at 27°C following standard protocols [15]. *P. falciparum* (NF54)

76 parasite cultures were either provided by the Johns Hopkins Malaria Institute Core

77 Facility, or produced in our lab following protocols described in [15]. In all cases

78 gametocyte cultures reached approximately 2-4% mature gametocytemia and were

79 between 14-17 days post gametocyte induction when cultures were fed to 3-5 day old

80 mosquitoes. After 20 minutes, blood-fed females were moved to temperature-controlled

81 incubators, set at  $80 \pm 5\%$  RH. Mosquitoes were sampled over time with midguts and

82 salivary glands dissected to estimate oocyst and sporozoite infection (sampling intervals

83 given in electronic supplementary material, Table S1).

84

85 For *An. stephensi* (Liston), a dominant malaria vector in India, Asia, and parts of the

86 Middle East [16], we examined constant temperatures of 16, 17, 18, and 20°C, and

87 fluctuating temperature regimes of  $14 \pm 5$ ,  $16 \pm 5$  and  $18 \pm 5$ °C. For *An. gambiae* (NIH

88 G3), the primary vector in sub-Saharan Africa [17], we examined temperatures of 17, 19

89 and  $19 \pm 5$ °C. The daily fluctuations followed a previously described temperature model

90 [3,14]. Diurnal temperature ranges (DTR) of 5-20°C are common across many malaria

91 transmission settings [3,14,18] and so DTR of 10°C is a representative intermediate

92 value. For each temperature we had 1-6 biological replicates using separate infectious

93 feeds, with at least 150 mosquitoes per infectious feed (see Table S1 for details of  
94 replicate numbers and sample sizes). For each feed we included a control set of  
95 mosquitoes maintained at 27°C to confirm infections.

96

97 (b) Mosquito survival curves at constant and fluctuating temperature

98

99 How EIP affects malaria transmission depends in part on mosquito survival; the absolute  
100 duration of EIP does not matter so much as what proportion of mosquitoes survive the  
101 EIP to become infectious [15]. Therefore, to parallel the 18°C infection studies, we  
102 generated survival curves for adult *An. stephensi*. Mosquitoes 3-5 days old, reared in  
103 identical conditions to those in the infection studies, were provided a blood meal and then  
104 placed into incubators at either constant 18°C or  $18 \pm 5^\circ\text{C}$ . Mosquitoes were housed in  
105 cups in groups of 10, with a total of 200 mosquitoes per treatment. Cups were examined  
106 daily until the last mosquito died.

107

108

### 109 **3. Results**

110 The results of the infection experiments are summarized in Table 1 (details of sampling  
111 and parasite measures are given in Table S1).

112

113 We found no evidence for oocyst or sporozoite infection at constant 16°C over three  
114 replicate feeds. Oocyst prevalence in mosquitoes maintained at 27°C (controls) ranged  
115 from 82-100%, indicating that these feeds were infectious (Table S1). Positive salivary

116 gland infections were detected at constant 17, 18, and 20°C for *An. stephensi*, and 17 and  
117 19°C for *An. gambiae*. Rates of parasite development were greater than predicted by the  
118 established degree-day model.

119

120 Adding realistic diurnal temperature fluctuation enabled parasites to establish to oocyst  
121 stage at 14 and 16°C, and to complete development to sporozoite stage at 16°C in *An.*  
122 *stephensi*, albeit at low levels (Table 1). In the 18°C and 19°C treatments, temperature  
123 variation further shortened EIP for both vector species (Table 1).

124

125 Our relatively coarse sampling frequency does not enable us to precisely define EIP (i.e.  
126 to definitively capture the day the first individual mosquito becomes infectious).

127 However, by estimating 95% confidence intervals across the replicate infectious feeds we  
128 can determine a credible window for EIP, representing the latest day at which no

129 sporozoites were likely to be observed, and the latest day at which maximum sporozoite  
130 prevalence was likely to have occurred based on our observations. Our conservative

131 methodology minimized any differences between the observed values and the Detinova  
132 values. This approach conceptually follows recent work defining the completion of

133 sporogony as a distribution rather than a single time point [7,15,19]. Using this method  
134 we define a window of sporogony for *An. stephensi* of 31-37 days at 18°C, and 26-27

135 days at  $18 \pm 5^\circ\text{C}$  (Figure 1A&B). These empirical estimates are substantially shorter than  
136 the EIP of 56 days predicted by the degree-day model. The significance of these shorter

137 EIPs can be illustrated by integrating EIP with the respective mosquito survival (Figure  
138 1A&B). The shaded areas provide a measure of the daily number of infectious

139 mosquitoes alive, or ‘infectious-mosquito-days’, which all else being equal, scales with  
140 force of infection [15]. Our empirical data suggest a 2.7-fold increase in force of infection  
141 at constant 18°C compared with the degree-day model, and 8.5-fold increase at  $18 \pm 5^\circ\text{C}$ .

142

143

#### 144 **4. Discussion**

145 The Detinova model of EIP has been applied extensively for over 50 years, but with little  
146 critical evaluation. Our data suggest that 16°C, the minimum temperature threshold for  
147 parasite development assumed in the model, is a good approximation. Adding realistic  
148 diurnal temperature fluctuation at 16°C facilitated infection but only 2/377 mosquitoes  
149 were positive for sporozoites, so the effect is marginal. A threshold of 16°C is in line  
150 with very early empirical work and parasite kinetics research [20,21], but differs from a  
151 number of modeling studies that assume a lower limit of 18°C (reviewed in [22]).

152

153 However, the Detinova model dramatically underestimates parasite development rate at  
154 temperatures marginally above the lower threshold, and fails to capture the effects of  
155 realistic daily temperature variation, which enhances development still further. The  
156 Detinova model assumes that 111 cumulative degree-days are required to complete  
157 sporogony once temperature is above the lower threshold. The current study indicates  
158 that the required number of degree-days is not a constant 111 days, but varies non-  
159 linearly with temperature. Based on our observed approximations of EIP (Table 1) and  
160 the established lower developmental threshold of 16°C, we use the degree-day equation  
161 (Equation 1) to calculate that sporogony takes as few as 38, 66 and 104 degree-days at

162 17, 18 and 20°C, respectively, for *An. stephensi*. For *An. gambiae* we estimate 43 and 87  
163 degree-days at 17 and 19°C, respectively. Note that these estimates do not mean that EIP  
164 is shorter in absolute terms at cooler temperatures, but that at temperatures below 21°C it  
165 takes proportionally fewer degree-days for parasites to complete sporogony. Moreover,  
166 we find that realistic temperature fluctuation can enhance parasite development yet  
167 further. These findings are consistent with Jensen's inequality, which predicts that  
168 fluctuation around a mean temperature can modify (in this case increase) development  
169 rate compared to the same average constant temperature [23], and confirm earlier  
170 empirical research conducted using species of rodent malaria [14]. In turn, the faster  
171 parasite development yields potentially much greater force of infection under cooler  
172 environmental conditions than predicted using the Detinova model (illustrated in Fig 1).

173

174 We acknowledge that our study used lab-adapted mosquito and parasite strains and there  
175 is a need to validate our findings using local mosquito-parasite pairings. Local adaptation  
176 in vector and/or parasite population could change the thermal sensitivity of the vector-  
177 parasite interaction [24]. Note, however, this argument applies equally to the existing  
178 Detinova model (and indeed extends to many other mosquito-parasite studies that use lab  
179 strains). Similarly, our lab-based mosquito survival curves do not necessarily reflect  
180 patterns of survival in the field [25,26], yet qualitative differences in force of infection  
181 relative to the Detinova model should hold regardless. As such, our results challenge one  
182 of the most long-standing models in malaria biology and highlight a need for further  
183 studies to examine the thermal ecology of malaria, particularly at the edges of range in  
184 areas such as the Kenyan and Ethiopian highlands where the potential impacts of climate



185 change remain controversial [4,5,27,28].

186

187 **Ethical statement**

188 All experiments were conducted under Penn State IBC protocol #48219.

189

190 **Data availability**

191 Data from this study are available as electronic supplementary material in Table S1 for all

192 temperatures for mosquitoes dissected for oocysts and sporozoite dissections, sampling

193 intervals, replicates, and sample sizes.

194

195 **Author contributions**

196 JLW and ES conducted the experiments. PAL assisted in analysis. JLW and MBT wrote

197 the manuscript with inputs from ES and PAL.

198

199 **Competing interests**

200 The authors have no competing interests.

201

202 **Funding**

203 This study was part supported by NIH NIAID grant # R01AI110793, NSF grant # DEB-

204 151868, and the USDA NIFA and Hatch Appropriations under Project #PEN04691 and

205 Accession #1018545. The funders had no role in study design, data collection and

206 analysis, decision to publish, or preparation of the manuscript.

207

208 **Acknowledgments**

209 We thank MR4/BEI resources for provision of parasites. Thanks to Deonna Soergel,  
210 Dean Taylor and Janet Teeple for assistance in the lab, and Anna Guschin and Elizabeth  
211 Eswaskio for translating journal articles from Russian to English.

212

213 **Supplementary Information**

214 Electronic supplementary material is available online at (link that will be assigned to  
215 Table S1 <https://...>)

216

217 **References**

- 218 1. Mordecai, E. A. et al. 2017 Detecting the impact of temperature on transmission of  
219 Zika, dengue, and chikungunya using mechanistic models. *PLoS Negl. Trop. Dis.*  
220 **11**, 1-18 e0005568–18. (doi:10.1371/journal.pntd.0005568)
- 221 2. Mordecai, E. A. et al. 2012 Optimal temperature for malaria transmission is  
222 dramatically lower than previously predicted. *Ecol. Lett.* **16**, 22–30.  
223 (doi:10.1111/ele.12015)
- 224 3. Paaijmans, K. P., Read, A. F. & Thomas, M. B. 2009 Understanding the link  
225 between malaria risk and climate. *Proc. Natl. Acad. Sci. U.S.A.* **106**, 13844–13849.  
226 (doi:10.1073/pnas.0903423106)
- 227 4. Ryan, S. J., McNally, A., Johnson, L. R., Mordecai, E. A., Ben-Horin, T.,  
228 Paaijmans, K. & Lafferty, K. D. 2015 Mapping physiological suitability limits for  
229 malaria in Africa under climate change. *Vector Borne Zoonotic Dis.* **15**, 718–725.  
230 (doi:10.1089/vbz.2015.1822)

- 231 5. Hay, S. I., Cox, J., Rogers, D. J., Randolph, S. E., Stern, D. I., Shanks, G. D.,  
232 Myers, M. F. & Snow, R. W. 2002 Climate change and the resurgence of malaria  
233 in the East African highlands. *Nature* **415**, 905–909. (doi:10.1038/415905a)
- 234 6. Parham, P. E. et al. 2015 Climate, environmental and socio-economic change:  
235 weighing up the balance in vector-borne disease transmission. *Philos. Trans. R.*  
236 *Soc. Lond. B Biol. Sci.* **370**, 20130551–20130551. (doi:10.1098/rstb.2013.0551)
- 237 7. Ohm, J. R., Baldini, F., Barreaux, P., Lefèvre, T., Lynch, P. A., Suh, E.,  
238 Whitehead, S. A. & Thomas, M. B. 2018 Rethinking the extrinsic incubation  
239 period of malaria parasites. *Parasit. Vectors* **11**, 13. (doi:10.1186/s13071-018-  
240 2761-4)
- 241 8. Detinova, T. S. 1962 *Age-grouping methods in Diptera of medical importance*.  
242 Geneva: Monogr. Ser. World Health Organ. 47:13-91.
- 243 9. Nikolaev, B. P. 1935 On the influence of temperature on the development of  
244 malaria plasmodia in the mosquito. *Trans. Pasteur Inst. Epi. Bact. Leningrad* 2:1-  
245 5.
- 246 10. Boyd, M. F. & Stratman-Thomas, W. K. 1933 A note on the transmission of  
247 quartan malaria by *Anopheles quadrimaculatus*. *Am J Trop Med Hyg* **s1-13**, 265–  
248 271. (doi:<https://doi.org/10.4269/ajtmh.1933.s1-13.265>)
- 249 11. Boyd, M. F. 1932 Studies on *Plasmodium vivax*. 2. The influence of temperature  
250 on the duration of the extrinsic incubation period. *Am J Trop Med Hyg* **12**, 851–  
251 853.
- 252 12. Basu, B. C. 1943 Laboratory studies on the infectivity of *Anopheles annularis*. *J*  
253 *Malar Inst India* **5**, 31–51.

- 254 13. Knowles, R. & Basu, B. C. 1943 Laboratory studies on the infectivity of  
255 *Anopheles stephensi*. *J Malar Inst India* **5**, 1–29.
- 256 14. Paaijmans, K. P., Blanford, S., Bell, A. S., Blanford, J. I., Read, A. F. & Thomas,  
257 M. B. 2010 Influence of climate on malaria transmission depends on daily  
258 temperature variation. *Proc. Natl. Acad. Sci. U.S.A.* **107**, 15135–15139.  
259 (doi:10.1073/pnas.1006422107)
- 260 15. Shapiro, L. L. M., Whitehead, S. A. & Thomas, M. B. 2017 Quantifying the  
261 effects of temperature on mosquito and parasite traits that determine the  
262 transmission potential of human malaria. *PLoS Biol.* **15**, 1-21 e2003489–21.  
263 (doi:10.1371/journal.pbio.2003489)
- 264 16. Sinka, M. E. et al. 2011 The dominant *Anopheles* vectors of human malaria in the  
265 Asia-Pacific region: occurrence data, distribution maps and bionomic précis.  
266 *Parasit Vectors* **4**, 1–46. (doi:10.1186/1756-3305-4-89)
- 267 17. Sinka, M. E. et al. 2010 The dominant *Anopheles* vectors of human malaria in  
268 Africa, Europe and the Middle East: occurrence data, distribution maps and  
269 bionomic précis. *Parasit Vectors* **3**, 1-34. (doi:10.1186/1756-3305-3-117)
- 270 18. Blanford, J. I., Blanford, S., Crane, R. G., Mann, M. E., Paaijmans, K. P.,  
271 Schreiber, K. V. & Thomas, M. B. 2013 Implications of temperature variation for  
272 malaria parasite development across Africa. *Sci. Rep.* **3**, 13–11.  
273 (doi:10.1038/srep01300)
- 274 19. Paaijmans, K. P., Blanford, S., Chan, B. H. K. & Thomas, M. B. 2012 Warmer  
275 temperatures reduce the vectorial capacity of malaria mosquitoes. *Biol. Lett.* **8**,  
276 465–468. (doi:10.1098/rsbl.2011.1075)

- 277 20. Mitzmain, M. B. 1917 The malaria parasite in the mosquito: the effects of low  
278 temperature and other factors on its development. *Public Health Rep. (1896-1970)*  
279 **32**, 1400-1413. (doi:10.2307/4574614)
- 280 21. Noden, B. H., Kent, M. D. & Beier, J. C. 1995 The impact of variations in  
281 temperature on early *Plasmodium falciparum* development in *Anopheles stephensi*.  
282 *Parasitology* **111**, 539–547. (doi:10.1017/S0031182000077003)
- 283 22. Ermert, V., Fink, A.H., Jones, A.E. & Morse, A.P., 2011. Development of a new  
284 version of the Liverpool Malaria Model. I. Refining the parameter settings and  
285 mathematical formulation of basic processes based on a literature review. *Malar.*  
286 *J.*, **10**, 1-17.
- 287 23. Ruel, J. J. & Ayres, M. P. 1999 Jensen’s inequality predicts effects of  
288 environmental variation. *Trends Ecol Evol.* **14**, 361–366.. (doi:10.1016/s0169-  
289 5347(99)01664-x)
- 290 24. Sternberg, E. D. & Thomas, M. B. 2014 Local adaptation to temperature and the  
291 implications for vector-borne diseases. *Trends Parasitol.*,**30**, 115–122.  
292 (doi:10.1016/j.pt.2013.12.010)
- 293 25. Clements, A. N. & Paterson, G. D. 1981 The analysis of mortality and survival  
294 rates in wild populations of mosquitoes. *J Appl Ecol.* **18**, 373-399.
- 295 26. Brady, O. J. et al. 2013 Modelling adult *Aedes aegypti* and *Aedes albopictus*  
296 survival at different temperatures in laboratory and field settings. *Parasit Vectors*  
297 **6**, 1–12. (doi:10.6084/m9.figshare.865034)
- 298 27. Pascual, M., Ahumada, J. A., Chaves, L. F., Rodo, X. & Bouma, M. 2006 Malaria  
299 resurgence in the East African highlands: Temperature trends revisited. *Proc. Natl.*

300 *Acad. Sci. U.S.A.* **103**, 5829–5834.

301 28. Siraj, A. S., Santos-Vega, M., Bouma, M. J., Yadeta, D., Carrascal, D. R. &  
302 Pascual, M. 2014 Altitudinal changes in malaria incidence in highlands of Ethiopia  
303 and Colombia. *Science* **343**, 1154–1158. (doi:10.1126/science.1248707)

304

305

306

307

308

309

310

311

312

313

314

315

316

317

318

319

320

321

322

323 **Table 1.** Summary of *P. falciparum* infection across a range of temperatures, showing the  
 324 number of replicate infectious feeds, the number of mosquitoes dissected to examine for  
 325 oocysts and sporozoites, the day post-blood-feed when sporozoites were first observed in  
 326 mosquito salivary glands, and the equivalent EIP predicted by the Detinova degree-day  
 327 model [8].  
 328

| Mosquito species and Temperature regime (°C) | No. of replicate infectious feeds | Dissection days post feed (and total no. mosquitoes dissected for oocysts, and sporozoites) | Presence of oocysts (and maximum prevalence on a given day) | Presence of sporozoites (and maximum prevalence on a given day) | Day sporozoites first detected in salivary glands | EIP (days) predicted by degree-day model |
|----------------------------------------------|-----------------------------------|---------------------------------------------------------------------------------------------|-------------------------------------------------------------|-----------------------------------------------------------------|---------------------------------------------------|------------------------------------------|
| <i>An. stephensi</i>                         |                                   |                                                                                             |                                                             |                                                                 |                                                   |                                          |
| 16 ± 0                                       | 3                                 | 40-62 (50, 92)                                                                              | No                                                          | No                                                              | NA                                                | Infinite                                 |
| 17 ± 0                                       | 2                                 | 34-60 (64, 273)                                                                             | Yes (55%)                                                   | Yes (57%)                                                       | 38                                                | 111                                      |
| 18 ± 0                                       | 3                                 | 16-62 (402, 322)                                                                            | Yes (75%)                                                   | Yes (73%)                                                       | 33                                                | 56                                       |
| 20 ± 0                                       | 1                                 | 11-39 (148, 114)                                                                            | Yes (80%)                                                   | Yes (78%)                                                       | 26                                                | 28                                       |
| 14 ± 5                                       | 3                                 | 17-60 (144, 217)                                                                            | Yes (3%)                                                    | No                                                              | NA                                                | Infinite                                 |
| 16 ± 5                                       | 6                                 | 16-55 (362, 377)                                                                            | Yes (5%)                                                    | Yes (5%)                                                        | 30                                                | Infinite                                 |
| 18 ± 5                                       | 2                                 | 15-62 (286, 228)                                                                            | Yes (79%)                                                   | Yes (85%)                                                       | 27                                                | 56                                       |
| <i>An. gambiae</i>                           |                                   |                                                                                             |                                                             |                                                                 |                                                   |                                          |
| 17 ± 0                                       | 2                                 | 34-50 (107, 273)                                                                            | Yes (13%)                                                   | Yes (3%)                                                        | 43                                                | 111                                      |
| 19 ± 0                                       | 2                                 | 23-41 (52, 383)                                                                             | Yes (40%)                                                   | Yes (23%)                                                       | 29                                                | 37                                       |
| 19 ± 5                                       | 2                                 | 18-40 (80, 491)                                                                             | Yes (50%)                                                   | Yes (33%)                                                       | 25                                                | 37                                       |

329

330 **Figure 1.** Plot line shows survival of mosquitoes that we assume will become infectious  
331 following a parasite-infected blood meal. Areas under the line represent total mosquito  
332 days of life, based on empirical data for *An. stephensi* at (A) 18°C, and (B) 18 ± 5°C. The  
333 dashed line bounding the grey area represents estimated EIP, or parasite sporogony,  
334 based on observed data at these temperatures. The grey area represents the number of  
335 infectious-mosquito-days, which provides a relative measure of force of infection. Within  
336 the larger grey area, the hatched shading represents infectious-mosquito-days calculated  
337 using the degree-day model of Detinova [8].

338

339

340

341

342

343

344

345

346

347

348

349

350

351

352



**A**

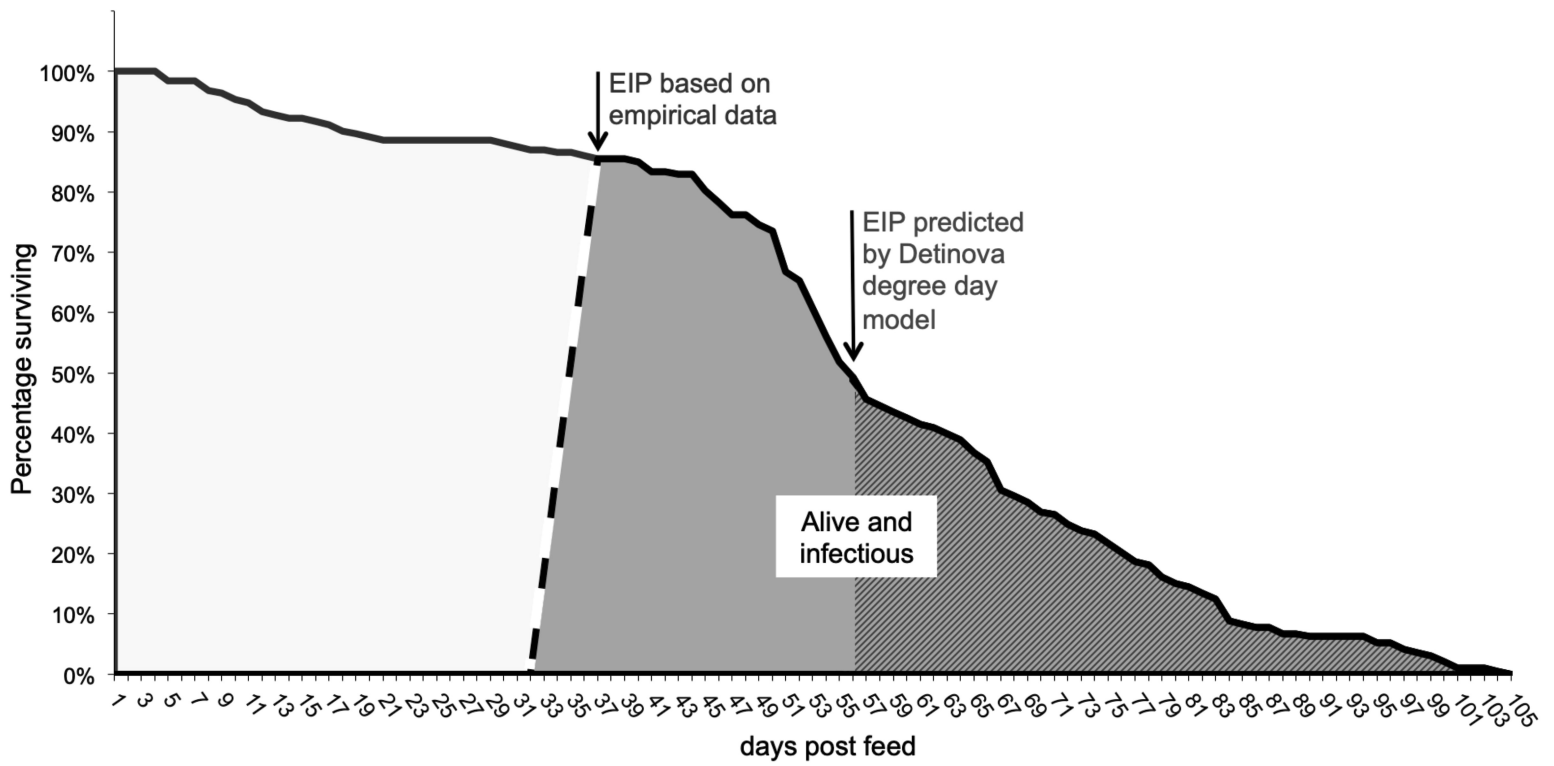

**B**

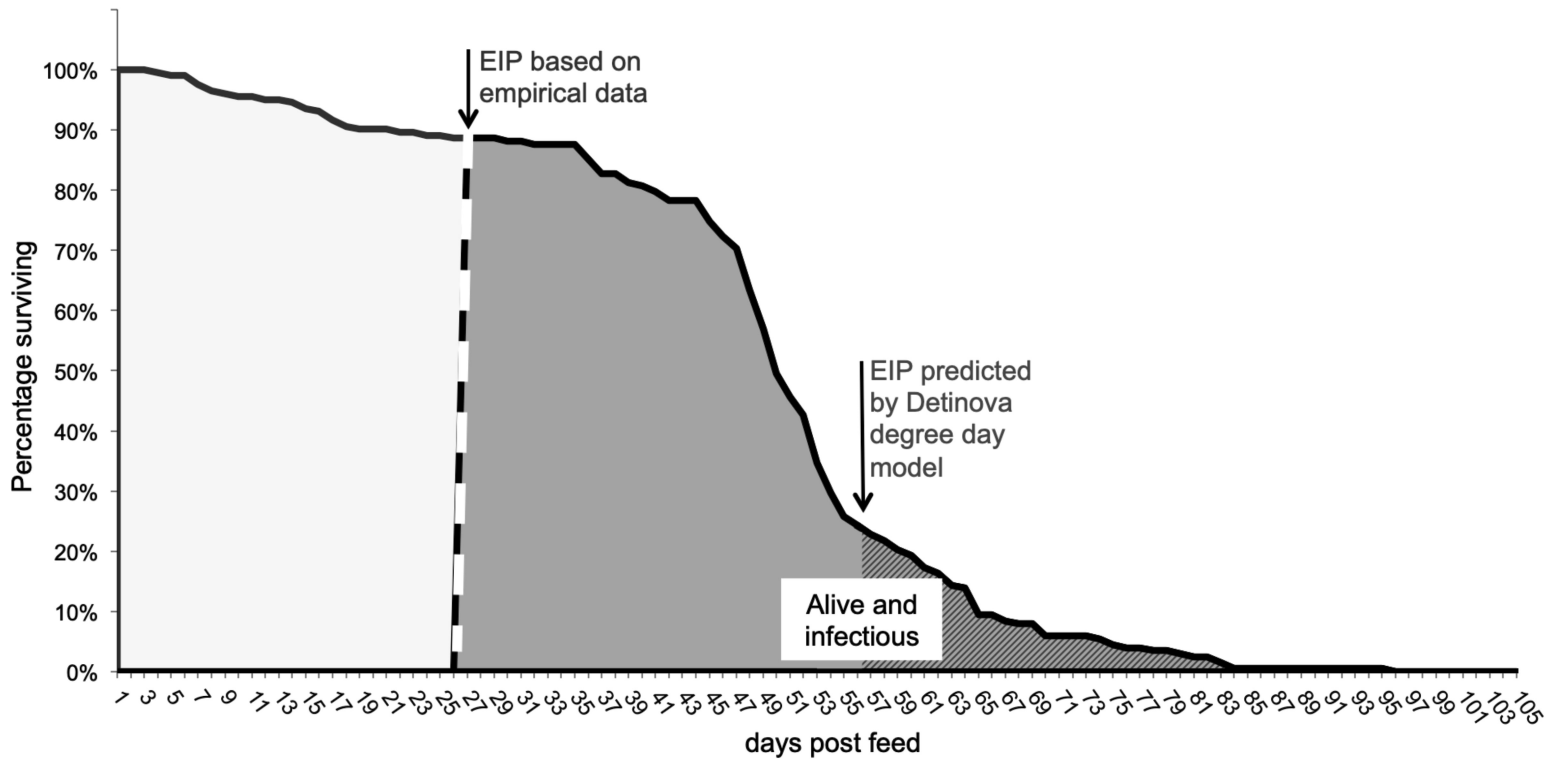

Source: http://biorxiv.org/content/10.1101/603787v1.full.pdf
